# Supplementary material for: Peroxisome proliferator-activated receptor δ agonist attenuates hepatic steatosis by anti-inflammatory mechanism
Source: PubMed Central journal article supplement — Exp Mol Med. 2012 Jul 24;44(10):578–85. doi: 10.3858/emm.2012.44.10.066 (PMC3490079; doi:10.3858/emm.2012.44.10.066), 2012-07-24
Supplement: emm-44-578-s001.pdf [file emm-44-578-s001.pdf]

**Supplemental Table S1.** Primers for real time RT-PCR

| Gene name              |         | Primer sequence              |
|------------------------|---------|------------------------------|
| HepG2 cell             |         |                              |
| TNF- $\alpha$          | Forward | 5'-CCAGACCAAGGTCAACCTC-3'    |
|                        | Reverse | 5'-CCAGATAGATGGGCTCATACC-3'  |
| IL-6                   | Forward | 5'-AAAAGTCCTGATCCAGTTC-3'    |
|                        | Reverse | 5'-GAGATGAGTTGTCATGTCC-3'    |
| PGC-1 $\alpha$         | Forward | 5'-TGTGCAACTCTCTGGAACTG-3'   |
|                        | Reverse | 5'-TGAGGACTTGCTGAGTGGTG-3'   |
| NF- $\kappa$ B         | Forward | 5'-GAAGAAAATGGTGGAGTCTG-3'   |
|                        | Reverse | 5'-GGTTCAGTACTTTCCAAGTC-3'   |
| GAPDH                  | Forward | 5'-ACCCACTCCTCCACCTTTG-3'    |
|                        | Reverse | 5'-CTCTTGTGCTCTTGCTGGG-3'    |
| OLETF rat liver tissue |         |                              |
| MCP-1                  | Forward | 5'-TCTCTTCCTCCACCACTATGCA-3' |
|                        | Reverse | 5'-GGCTGAGACAGCACGTGGAT-3'   |
| TNF- $\alpha$          | Forward | 5'-ATGGATCTCAAAGACAACCA-3'   |
|                        | Reverse | 5'-TCCTGGTATGAAATGGCAAA-3'   |
| PGC-1 $\alpha$         | Forward | 5'-TGTTTCGATGTGTCGCCTTCT -3' |
|                        | Reverse | 5'-GAACGAGAGCGCATCCTTTG -3'  |
| CPT-1                  | Forward | 5'-GCTCGCACATTACAAGGACAT -3' |
|                        | Reverse | 5'-TGGACACCACATAGAGGCAG -3'  |
